# Supplementary material for: The BROAD study: A randomised controlled trial using a whole food plant-based diet in the community for obesity, ischaemic heart disease or diabetes
Source: PubMed Central journal article supplement (PMC5380896; doi:10.1038/nutd.2017.3), 2017-03-20

### Intervention group BMI

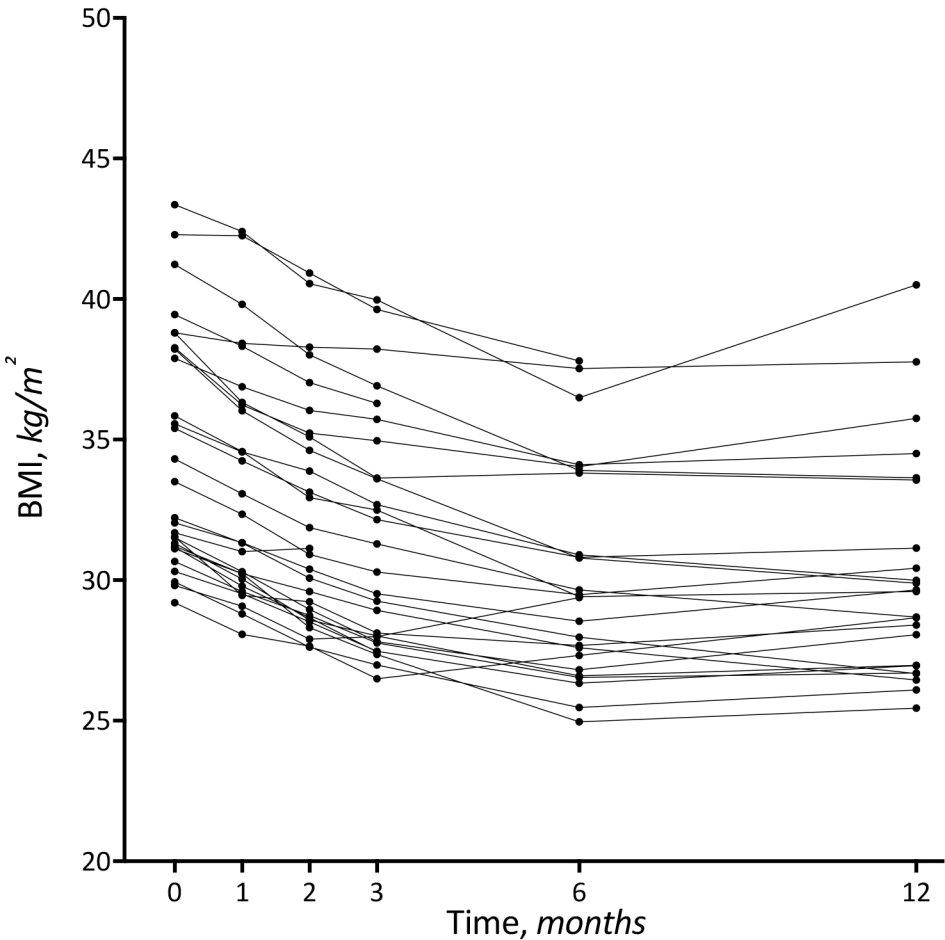

### Control group BMI

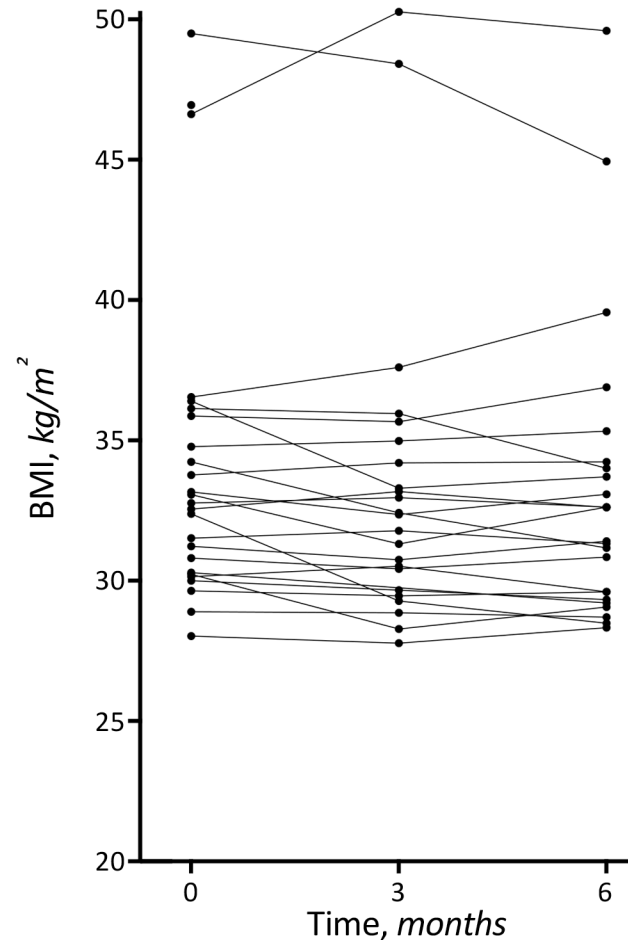

Supplement: nutd20173x1.pdf [file nutd20173x1.pdf]
