# Supplementary material for: The BROAD study: A randomised controlled trial using a whole food plant-based diet in the community for obesity, ischaemic heart disease or diabetes
Source: PubMed Central journal article supplement (PMC5380896; doi:10.1038/nutd.2017.3), 2017-03-20
Supplement: nutd20173x2.pdf [file nutd20173x2.pdf]

### Intervention group total cholesterol

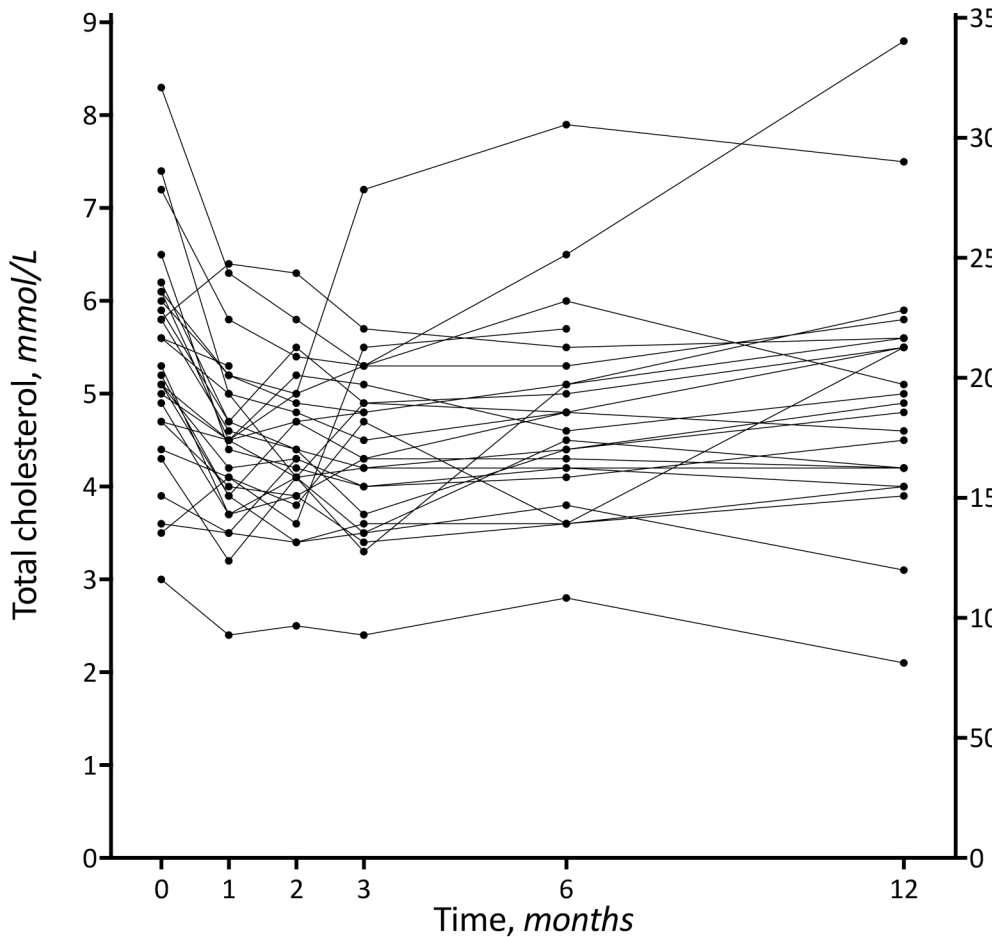

### Control group total cholesterol

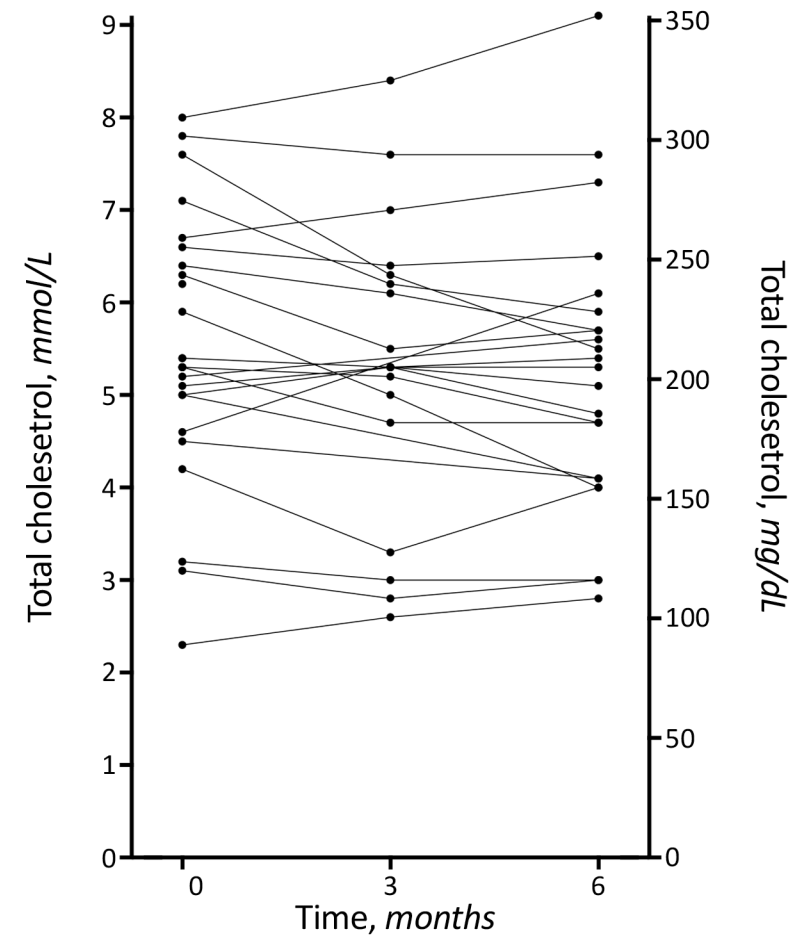

Patients, n 29 28 27 26 25 24 23 23

Patients, n 25 19 23
